# Supplementary material for: Cost-Effective Control of Plant Disease When Epidemiological Knowledge Is Incomplete: Modelling Bahia Bark Scaling of Citrus
Source: PubMed Central journal article supplement (PMC4125052; doi:10.1371/journal.pcbi.1003753), 2014-08-07
Supplement: pcbi.1003753.s001.pdf [file pcbi.1003753.s001.pdf]

## Table S1. Symbols, definitions and typical values for variables and parameters

**Table 1.** The ranges of values for  $\alpha, \beta, \gamma$  and  $\delta$  are 95% credible intervals as obtained in estimation. The effective infectious period,  $\iota$ , is the average time for which a host is infectious if roguing occurs. The relative cost of surveying,  $\sigma$ , is the ratio of prices of examining a single plant once for symptoms of disease to the difference between the sale price of the fruit harvested from a healthy tree and the cost of its cultivation over a single year. The correction factor  $\epsilon$  accounts for roguing intervals  $\Delta$  that are not exactly divisible into the 20 year period we examine (cf. Equation 8 in the main text).

| Symbol              | Description                                  | Value/Definition                                                                 |
|---------------------|----------------------------------------------|----------------------------------------------------------------------------------|
| $t$                 | Time since initial planting                  | -                                                                                |
| $S(t)$              | Number of susceptible plants                 | -                                                                                |
| $E(t)$              | Number of exposed plants                     | -                                                                                |
| $I(t)$              | Number of infected plants                    | -                                                                                |
| $R(t)$              | Number of removed plants                     | -                                                                                |
| $A(t)$              | Number of asymptomatic plants                | $A(t) = S(t) + E(t)$                                                             |
| $E_0$               | Percentage of plants exposed at $t = 0$      | varied (default 1% or 4%)                                                        |
| $\phi_i$            | Rate at which $i^{th}$ host becomes infected | $\beta \sum_{j \in \Omega_I} K(d_{ji}; \alpha)$                                  |
| $\Omega_S$          | Set of susceptible hosts                     | -                                                                                |
| $\Omega_E$          | Set of exposed hosts                         | -                                                                                |
| $\Omega_I$          | Set of infectious hosts                      | -                                                                                |
| $K(d_{ij}; \alpha)$ | Dispersal kernel                             | $(2\pi\alpha^2)^{-1} \exp(-d/\alpha)$                                            |
| $d_{ij}$            | Distance between hosts $i$ and $j$           | -                                                                                |
| $\alpha$            | Dispersal scale (mean $2\alpha$ )            | [1.96, 3.21] m                                                                   |
| $\beta$             | Rate of infection                            | [2.79, 7.31] $\text{m}^2 \text{month}^{-1}$                                      |
| $\rho$              | Rate of onset of infectiousness/symptoms     | [0.135, 0.235] $\text{month}^{-1}$                                               |
| $\delta$            | Delay before epidemiological maturity        | [17.9, 25.4] month                                                               |
| $\Delta$            | Roguing interval                             | varied (default 1 year)                                                          |
| $p$                 | Probability of detection                     | varied (default 0.6)                                                             |
| $\iota$             | Effective infectious period                  | $\iota \approx \left(\frac{1}{p} - \frac{1}{2}\right) \Delta$                    |
| $\sigma$            | Relative cost of surveying                   | varied (default 0.1)                                                             |
| $T$                 | Total number of surveys                      | $T = \lfloor 20/\Delta \rfloor$                                                  |
| $V$                 | Total number of trees surveyed               | $V = \sum_{n=0}^T (A(n\Delta) + I(n\Delta)) + \epsilon$                          |
| $\epsilon$          | Correction factor                            | $\epsilon = \left(\frac{20}{\Delta} - T\right) \times (A(T\Delta) + I(T\Delta))$ |
| $Y$                 | Total number of trees harvested              | $Y = \sum_{t=3}^{20} A(t)$                                                       |
| $P$                 | Profit (up to a scale factor)                | $P = Y - \sigma V$                                                               |
